# Supplementary material
Source: PubMed Central journal article supplement (PMC6166680)
Supplement: 135611_1_supp_150418_p9xnvn.pdf [file 135611_1_supp_150418_p9xnvn.pdf]

# **Global involvement of lysine crotonylation in protein modification and transcription regulation in rice**

Shuai Liu<sup>1#</sup>, Chao Xue<sup>1#</sup>, Yuan Fang<sup>2</sup>, Gang Chen<sup>1</sup>, Xiaojun Peng<sup>3</sup>, Yong Zhou<sup>1</sup>, Chen Chen<sup>1</sup>,  
Guanqing Liu<sup>1</sup>, Minghong Gu<sup>1</sup>, Kai Wang<sup>4</sup>, Wenli Zhang<sup>2</sup>, Yufeng Wu<sup>2\*</sup>, Zhiyun Gong<sup>1\*</sup>

1: Jiangsu Key Laboratory of Crop Genetics and Physiology/Co-Innovation Center for Modern Production Technology of Grain Crops, Key Laboratory of Plant Functional Genomics of the Ministry of Education, Yangzhou University, Yangzhou 225009, China

2: The State Key Laboratory of Crop Genetics and Germplasm Enhancement, Bioinformatics Center, Jiangsu Collaborative Innovation Center for Modern Crop Production, Nanjing Agricultural University, Nanjing 210095, China

3: Jingjie PTM BioLab (Hangzhou) Co. Ltd., Hangzhou 310018, China

4: Center for Genomics and Biotechnology, Fujian Agriculture and Forestry University, Fuzhou 350002, China

#: These authors contributed equally to this work.

\*Corresponding authors E-mail address: [zygong@yzu.edu.cn](mailto:zygong@yzu.edu.cn) or [yfwu@njau.edu.cn](mailto:yfwu@njau.edu.cn)

## SUPPORTING INFORMATION

**Supplemental\_Fig\_S1. Quality control validation of MS data.** (A) Mass error distribution of all identified peptides. (B) Distribution of crotonylated peptides based on their length. (C) Distribution of crotonylated proteins based on their number of crotonylated peptides.

**Supplemental\_Fig\_S2. Representative MS/MS spectra of validated crotonylated peptides in rice seedling.** (A) Crotonylpeptide TIMP-(crotonyl)K-DIQLA with cronylation site at K122 in histone H3. (B) Crotonylpeptide IQGIT-(crotonyl)K-PAIR with cronylation site at K31 in histone H4. (C) Crotonylpeptide LEV-(crotonyl)K-EIAEIM with cronylation site at K817 in chaperone protein C1pC2. (D) Crotonylpeptide LAEEG-(crotonyl)K-VAIR with cronylation site at K205 in ribosome-recycling factor.

**Supplemental\_Fig\_S3. Functional annotation of lysine crotonylome.** Representative GO annotations of Kcr sites for (A) biological process, (B) molecular function, and (C) cellular component, and (D) KEGG pathway analysis of lysine-crotonylated proteins.

**Supplemental\_Fig\_S4. WB analysis in green and albino seedlings.** (A) The morphology of green seedlings and albino seedlings derived from anther culture of *Oryza sativa* variety “Nipponbare”. (B) WB analysis was performed using anti-Kcr antibody in green seedlings and albino seedlings derived from anther culture.

**Supplemental\_Fig\_S5. Protein-protein interaction network.** The balls represent crotonylated proteins. The size of the balls represents the numbers of Kcr modification in each figure.

**Supplemental\_Fig\_S6. IF and WB analysis were performed using anti-H3K14cr antibody.** (A) The specificity antibody H3K14cr (green) was detected in two-week-old rice root by immunofluorescence, and nuclei was stained with DAPI (red). Scale bars: 5 $\mu$ m. (B) Western blotting analysis in rice seedlings whole protein and histone.

**Supplemental\_Fig\_S7. Distribution of H3K14cr density around differentially expressed**

**genes. (A)** Genome-wide distribution of histone H3K14cr in the rice genome. **(B)** Distribution of H3K14cr density around differentially expressed genes. The H3K14cr modification was calculated by the number of reads per kilobase of the mapped genomic region. The arrow indicates the direction of transcription from transcription start site (TSS). The rice genes were divided into five categories based the expression level from top 20% to bottom 20% (0-20%).

**Supplemental\_Fig\_S8. Expression comparisons of genes associated with different combinations of histone modifications.** The non-TE gene expression values (FPKM) of each combination were indicated by box plots. All: all rice genes. Kcr: genes with Kcr modification but not only. Kcr+K9ac: genes with both Kcr and H3K9ac. Kcr only: Genes only with Kcr. The rest may be deduced by analogy. The \*\*\* indicated the significant difference between two combinations ( $p < 2.2e-16$ , Kolmogorov-Smirnov test).

**Supplemental\_Fig\_S9. The distribution of histone Kcr in 12 chromosomes of rice.**

**Supplemental\_Fig\_S10. The phylogenic tree of p300/CBP homologous genes in rice, maize, wheat and Arabidopsis genome.**

**Supplemental\_Table\_S1. Protein annotation summary**

**Supplemental\_Table\_S2. Gene ontology annotation detail.**

**Supplemental\_Table\_S3. Protein-protein interaction network.**

**Supplemental\_Table\_S4. Seven Kcr sites identified in rice histones.**

**Supplemental\_Table\_S5. Summary of ChIP-seq data.**

**Supplemental\_Table\_S6. The lists of all enriched regions with Kcr and H3K14cr.**

**Supplemental\_Table\_S7. Confirmation of peak sites and non-peak sites by quantitative PCR.**

**Supplemental\_Table\_S8. Over-represented functions of genes associated with Kcr modification.**

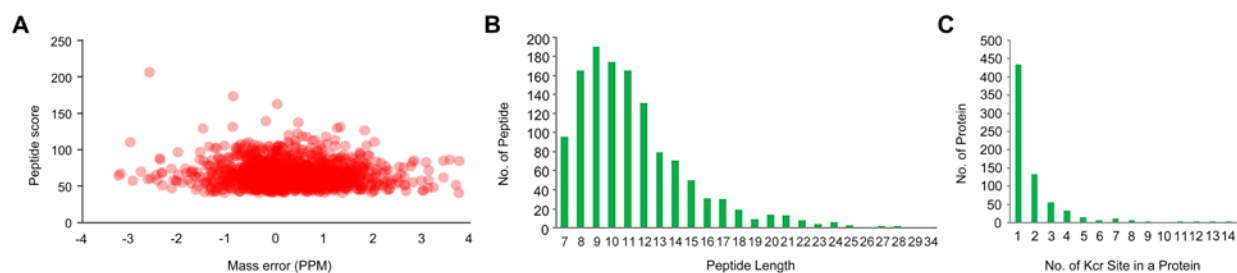

**Supplemental\_Fig\_S1. Quality control validation of MS data.** (A) Mass error distribution of all identified peptides. (B) Distribution of crotonylated peptides based on their length. (C) Distribution of crotonylated proteins based on their number of crotonylated peptides.

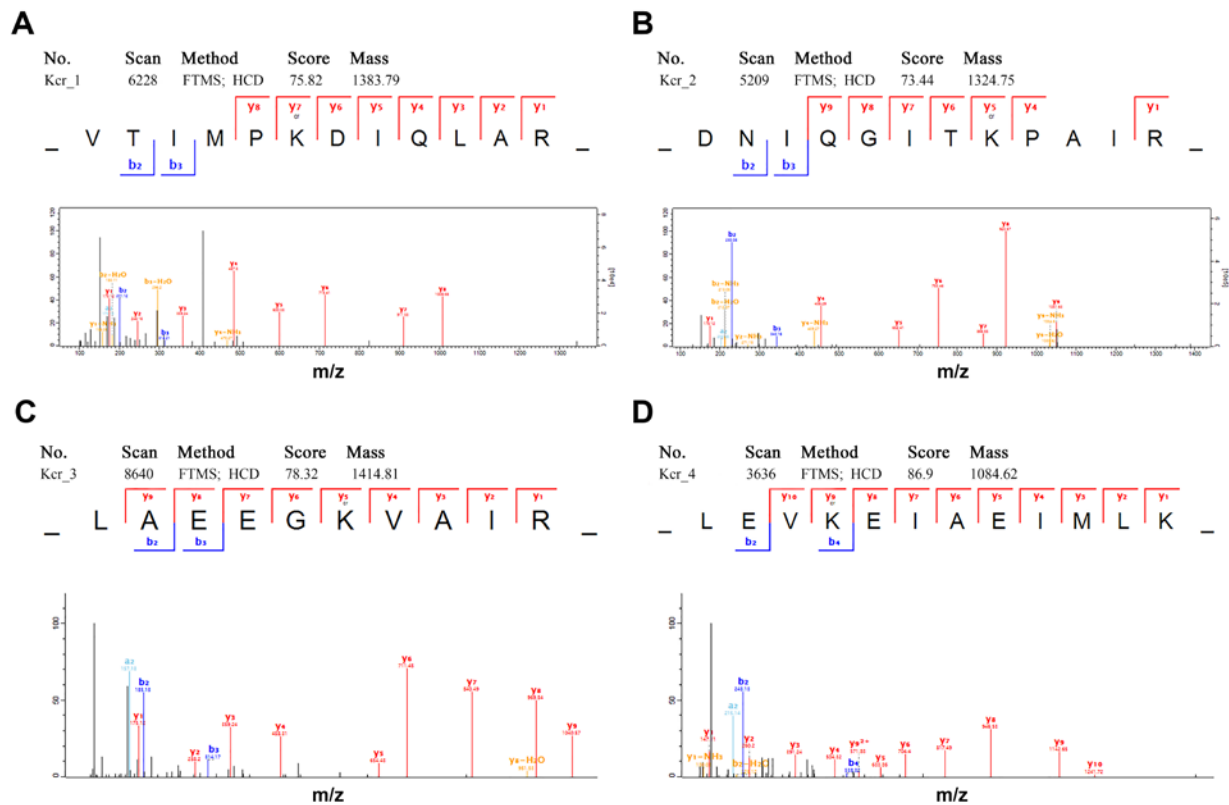

**Supplemental\_Fig\_S2. Representative MS/MS spectra of validated crotonylated peptides in rice seedling.** (A) Crotonylpeptide TIMP-(crotonyl)K-DIQLA with crotonylation site at K122 in histone H3. (B) Crotonylpeptide IQGIT-(crotonyl)K-PAIR with crotonylation site at K31 in histone H4. (C) Crotonylpeptide LEV-(crotonyl)K-EIAEIM with crotonylation site at K817 in chaperone protein C1pC2. (D) Crotonylpeptide LAEEG-(crotonyl)K-VAIR with crotonylation site at K205 in ribosome-recycling factor.

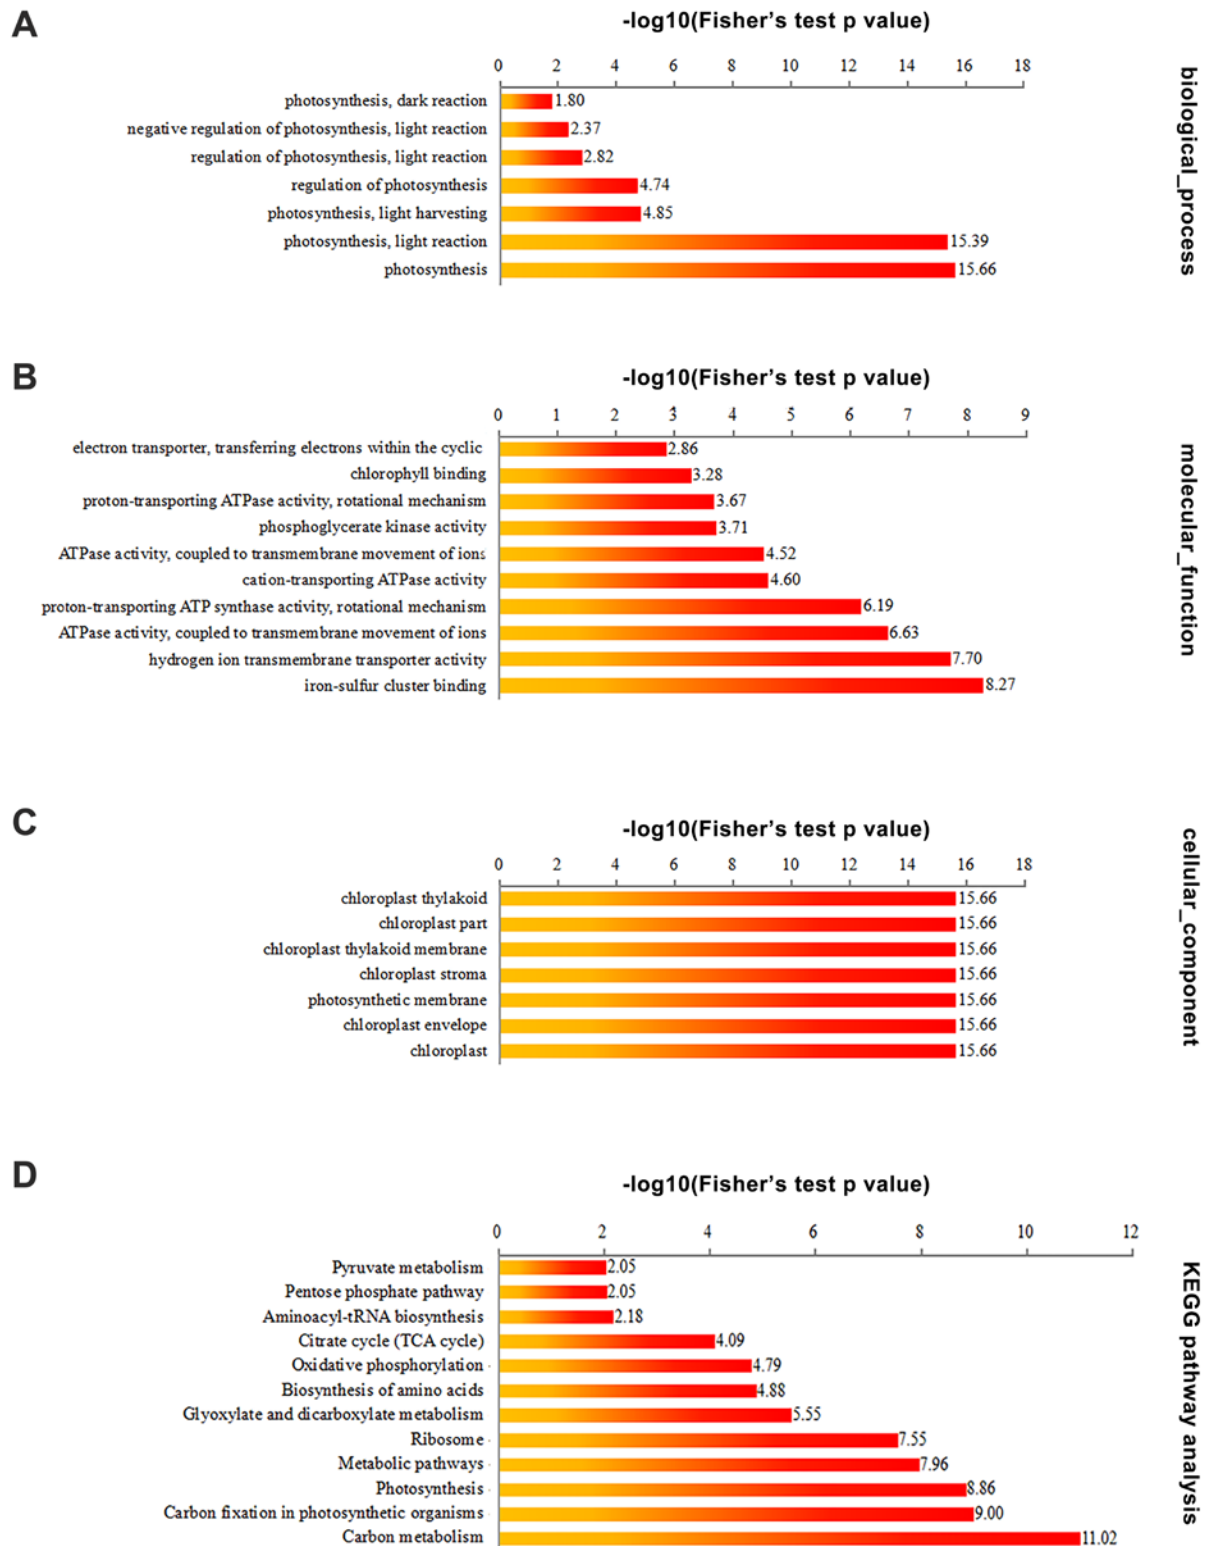

**Supplemental\_Fig\_S3. Functional annotation of lysine crotonylome.** Representative GO annotations of Kcr sites for (A) biological process, (B) molecular function, and (C) cellular component, and (D) KEGG pathway analysis of lysine-crotonylated proteins.

**A**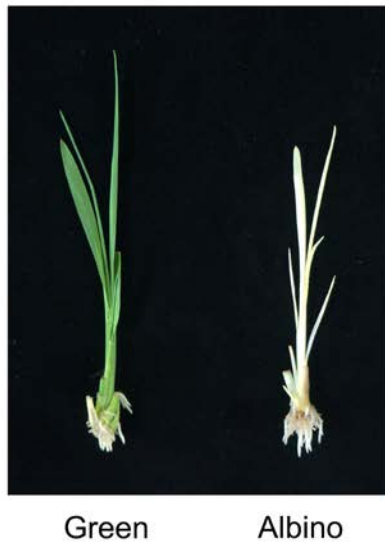**B**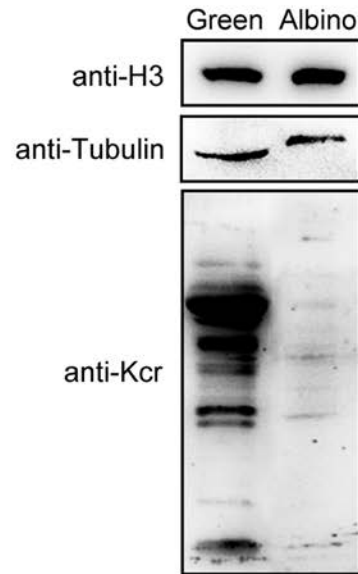

**Supplemental\_Fig\_S4. WB analysis in green and albino seedlings.** (A) The morphology of green seedlings and albino seedlings derived from anther culture of *Oryza sativa* variety “Nipponbare”. (B) WB analysis was performed using anti-Kcr antibody in green seedlings and albino seedlings derived from anther culture.

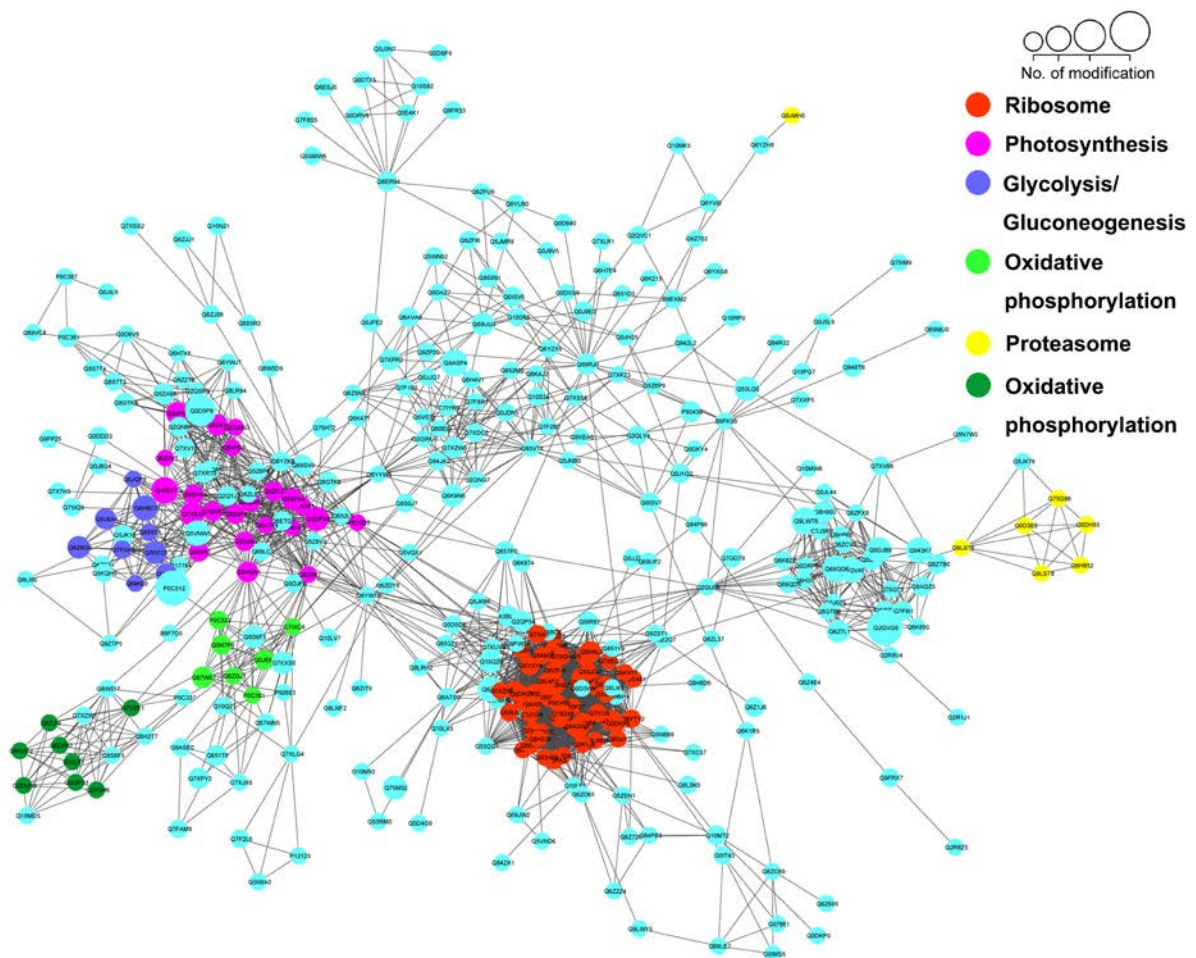

**Supplemental\_Fig\_S5. Protein-protein interaction network.** The balls represent crotonylated proteins. The size of the balls represents the numbers of Kcr modification in each figure.



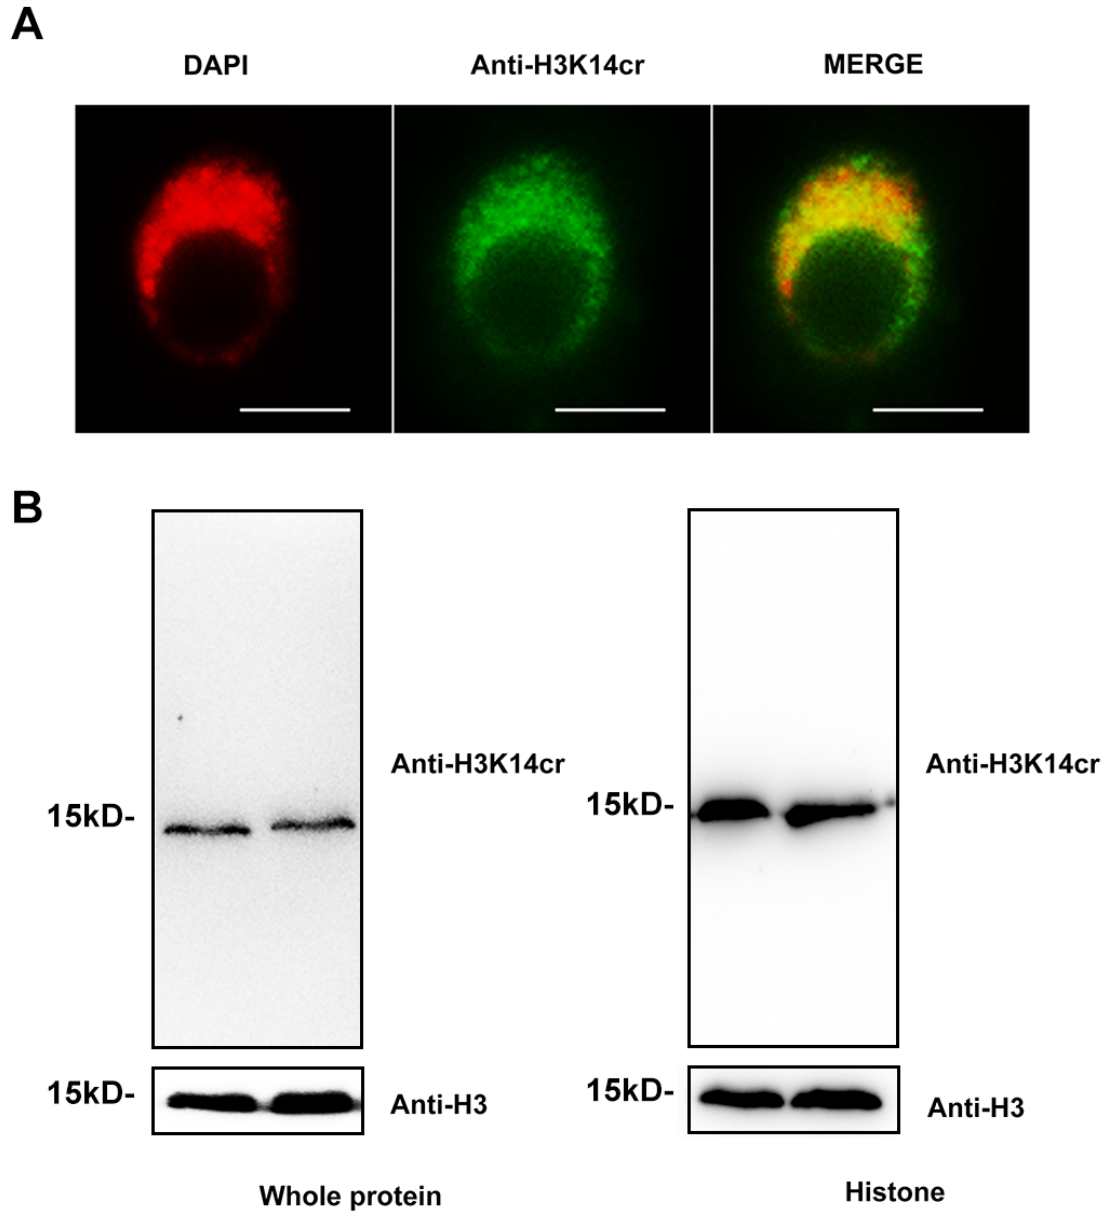

**Supplemental\_Fig\_S6. IF and WB analysis were performed using anti-H3K14cr antibody.**

(A) The specificity antibody H3K14cr (green) was detected in two-week-old rice root by immunofluorescence, and nuclei was stained with DAPI (red). Scale bars: 5 $\mu$ m. (B) Western blotting analysis in rice seedlings whole protein and histone.

(a)

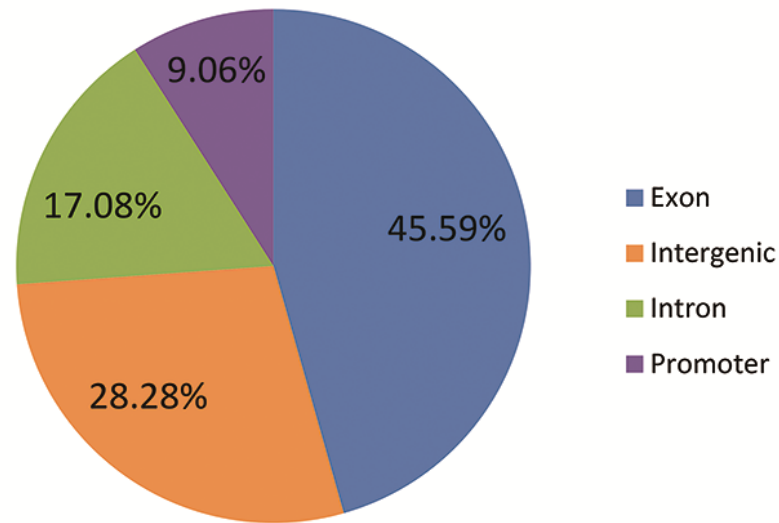

(b)

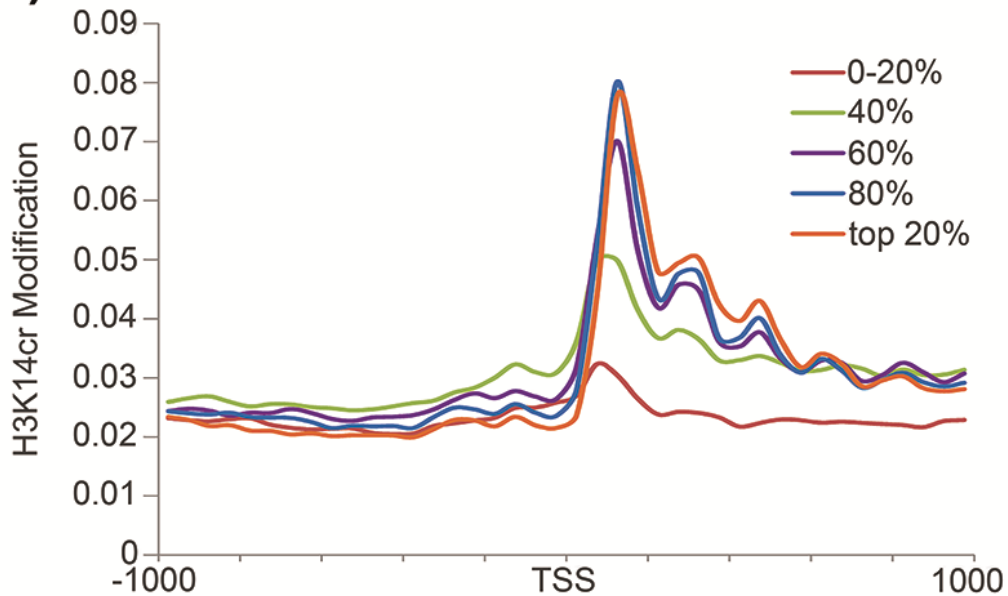

**Supplemental\_Fig\_S7. Distribution of H3K14cr density around differentially expressed genes.** (A) Genome-wide distribution of histone H3K14cr in the rice genome. (B) Distribution of H3K14cr density around differentially expressed genes. The H3K14cr modification was calculated by the number of reads per kilobase of the mapped genomic region. The arrow indicates the direction of transcription from transcription start site (TSS). The rice genes were divided into five categories based the expression level from top 20% to bottom 20% (0-20%).

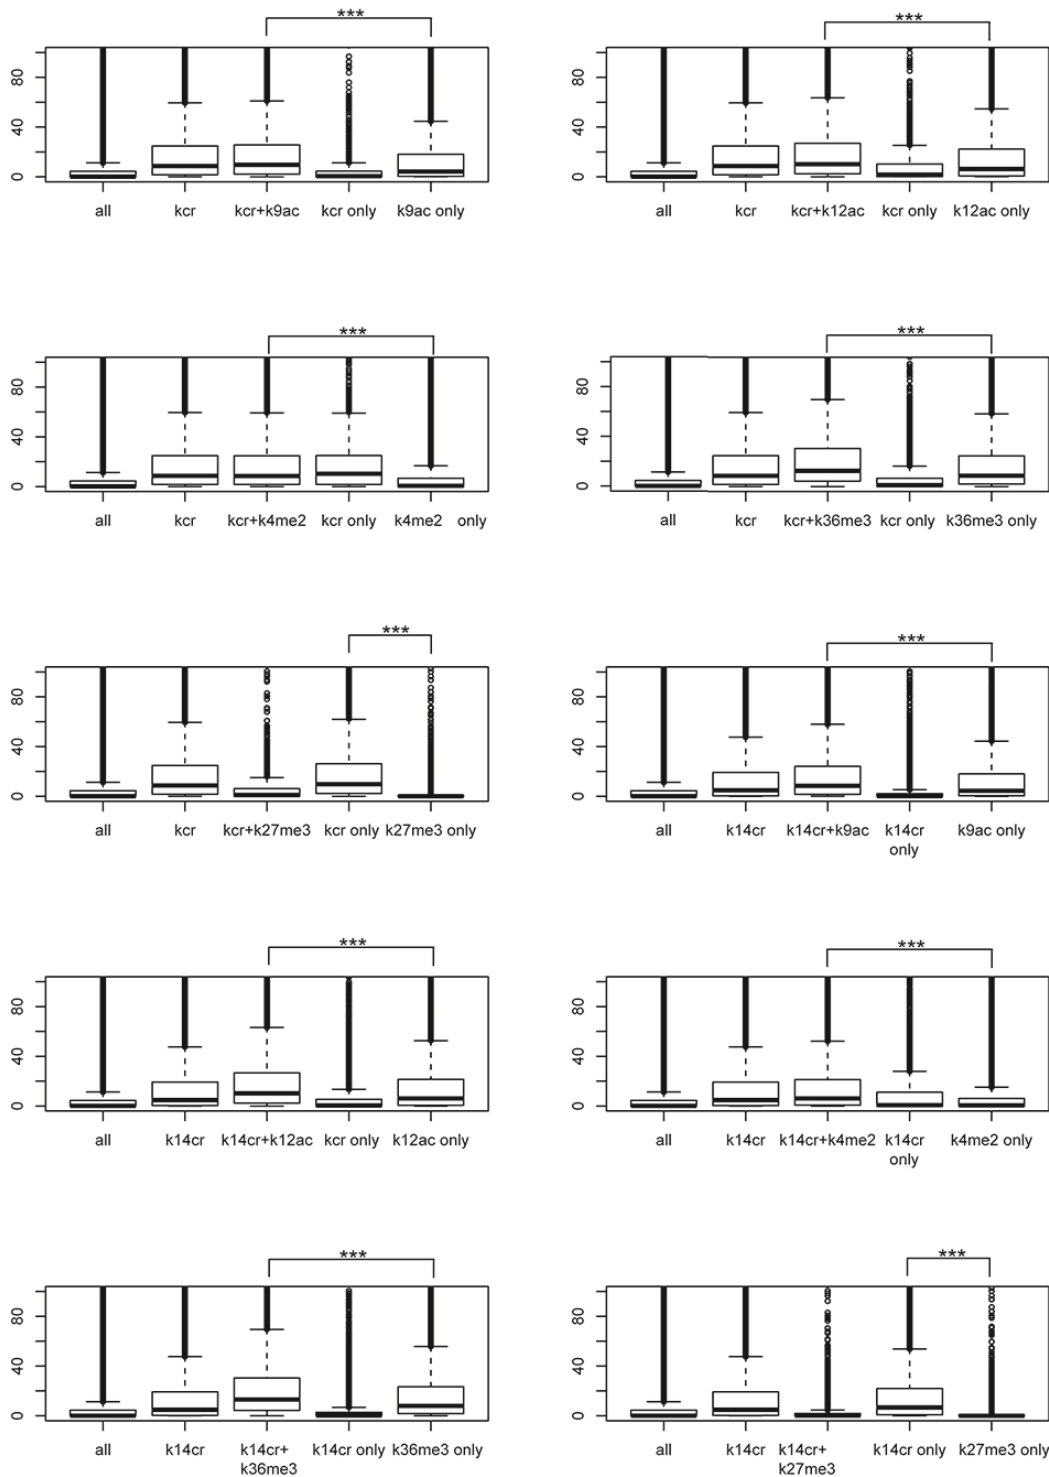

**Supplemental\_Fig\_S8. Expression comparisons of genes associated with different combinations of histone modifications.** The non-TE gene expression values (FPKM) of each combination were indicated by box plots. All: all rice genes. Kcr: genes with Kcr modification but not only. Kcr+K9ac: genes with both Kcr and H3K9ac. Kcr only: Genes only with Kcr. The rest may be deduced by analogy. The \*\*\* indicated the significant difference between two combinations ( $p < 2.2e-16$ , Kolmogorov-Smirnov test).

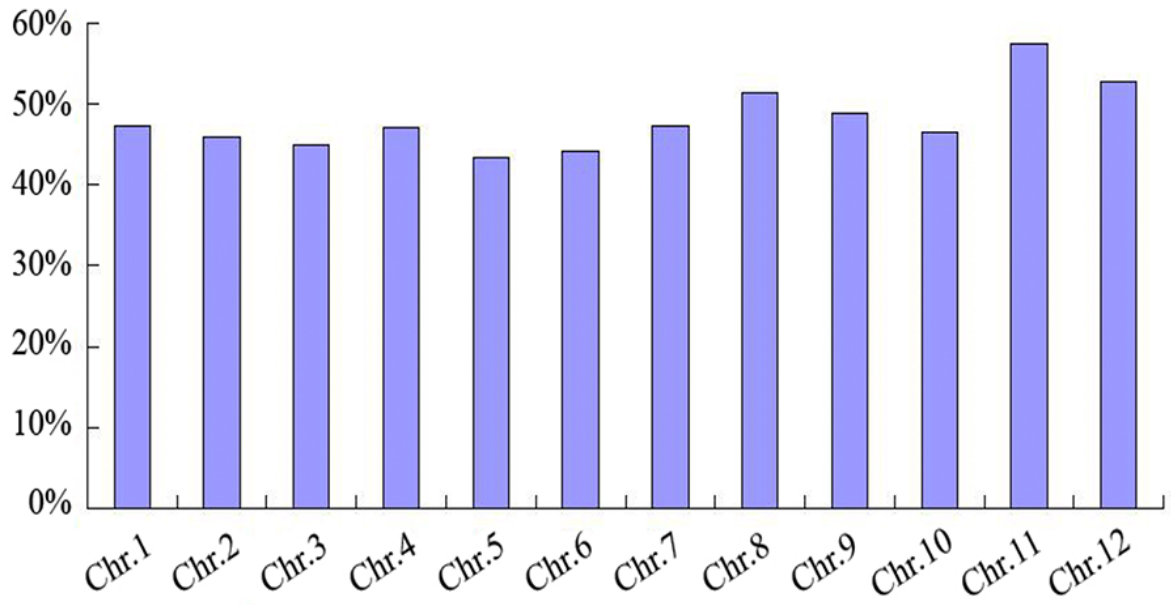

**Supplemental\_Fig\_S9. The distribution of histone Kcr in 12 chromosomes of rice.**

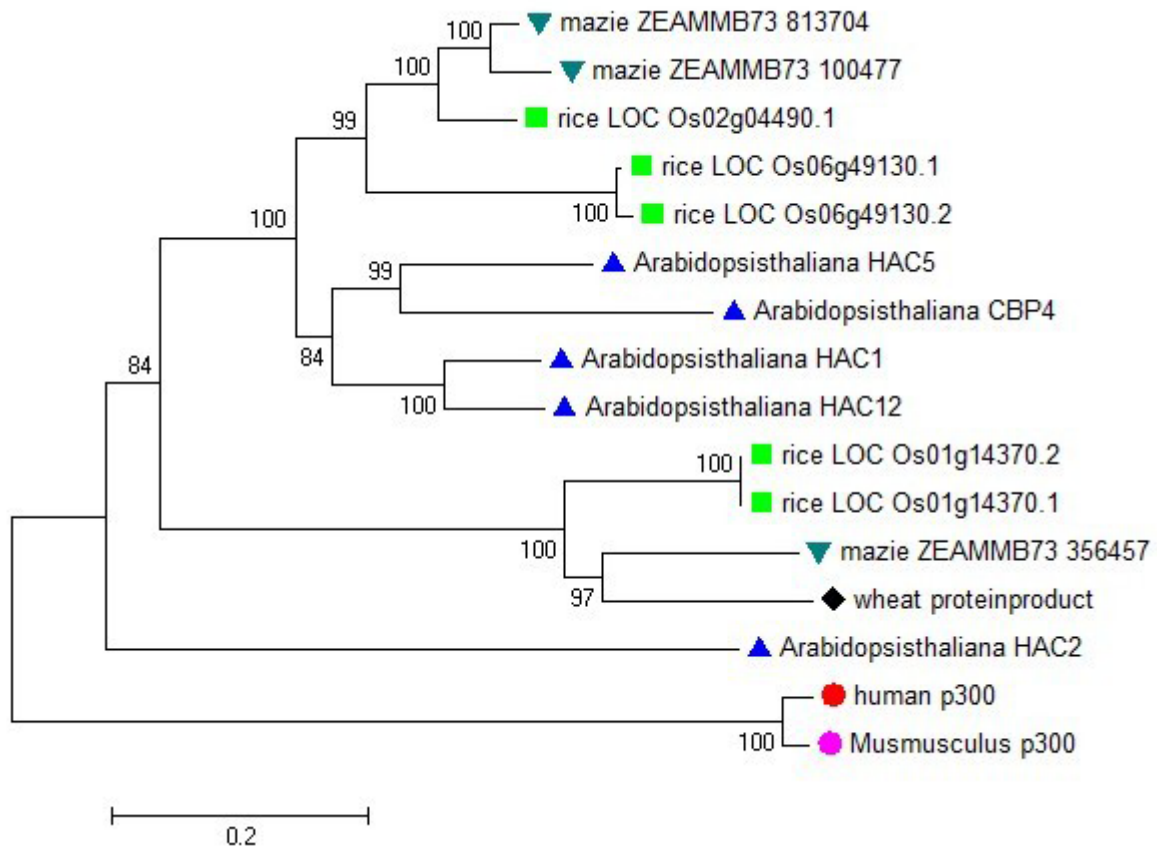

**Supplemental\_Fig\_S10. The phylogenetic tree of p300/CBP homologous genes in rice, maize, wheat and Arabidopsis genome.**

**Supplementary Table 4. Seven Kcr sites identified in rice histones**

| Protein ID | Modified sequence       | Position | Subcellular Location | Domain desc                 |
|------------|-------------------------|----------|----------------------|-----------------------------|
| Q0JQL7     | _HAVSEGTK(cr)AVTK_      | 33       | cytosol              | Histone-fold; Histone H2B;  |
| Q2RAD9     | _EIAQDFK(cr)TDLR_       | 80       | nuclear              | Histone core;               |
| Q2RAD9     | _STGGK(cr)APR_          | 15       | nuclear              | Histone-fold;               |
| Q2RAD9     | _VTIMPK(cr)DIQLAR_      | 123      | nuclear              | Histone H3;                 |
| Q2RAD9     | _YQK(cr)STELLIR_        | 57       | nuclear              |                             |
| Q7XUC9     | _DNIQGITK(cr)PAIR_      | 32       | nuclear              | Histone H4, conserved site; |
| Q7XUC9     | _K(cr)TVTAM(ox)DVVYALK_ | 80       | nuclear              | Histone core;               |

**Supplementary Table 5. Summary of ChIP-seq data**

| Libraries                        | Reads number | Mappable reads | Peaks | Common peaks |
|----------------------------------|--------------|----------------|-------|--------------|
| Kcr (pan-antibody)<br>replicate1 | 13,308,307   | ~88%           | 17514 | 10923        |
| Kcr (pan-antibody)<br>replicate2 | 12,219,425   | ~88%           | 12343 |              |
| H3K14cr replicate 1              | 77,102,925   | ~84%           | 21519 | 18813        |
| H3K14cr replicate 2              | 41,081,814   | ~80%           | 30856 |              |

**Supplementary Table 7. Confirmation of peak sites and non-peak sites by quantitative PCR**

| Genomic    |                   |                   |                        |                        |                                |                | Peak |
|------------|-------------------|-------------------|------------------------|------------------------|--------------------------------|----------------|------|
| Region     | qPCR <sup>1</sup> | qPCR <sup>2</sup> | Forward Primer         | Rverse Primer          | -10*log <sub>10</sub> (pvalue) |                |      |
| Os04g02060 | 0                 | 5.03              | GAACCAGACGAAGACCAT     | CGGACAGTTACGAATTGC     | 138.62                         | peak sites     |      |
| Os09g15850 | 0                 | 4.23              | CAGGAATGGATGAGGAAGAT   | GGATTGTGACGAACCTTTG    | 138.84                         | peak sites     |      |
| Os06g03860 | 0                 | 3.58              | CCTGTGGTAACTGCTAACT    | CCTAACTTGTC AACCTATTCC | 90.10                          | peak sites     |      |
| Os03g14400 | 0                 | 3.22              | GGTGCCTGCTACTGAATT     | GCTGGCTAATGTCGGATT     | 107.95                         | peak sites     |      |
| Os12g09000 | 0                 | 3.32              | ATTCATGTGGTGCCAGAG     | AAGATTCGTGGAACCTGGA    | 97.77                          | peak sites     |      |
| Os05g03140 | 0                 | 2.95              | AAGAAGGAGAAGAGCAAGAG   | GGCGAAGACGATGAAGAA     | 207.81                         | peak sites     |      |
| Os02g01790 | 0                 | 1.85              | CCTCTTATGAAGCCTGATACT  | CGGTTGGTTGAATGATTGG    | 351.35                         | peak sites     |      |
| Os07g01310 | 0                 | 4.35              | TAACGCTTACTCTGCTCTC    | ACCTGTCCTCAATCAATCT    | 76.20                          | peak sites     |      |
| Os08g01590 | 0                 | 1.63              | CATCAACACAGATACTCATACC | CACAACCTCTAATGTCTACTG  | 207.85                         | peak sites     |      |
| Os04g02850 | 0                 | 4.21              | GCAGCAGCTAGAAGAAGG     | GTACGCCATGATGAGGAC     | 116.31                         | peak sites     |      |
| Os11g03734 | 0                 | 1.73              | CTGGAGCCAAACATCAA      | ACAGACAACCTCTATCCTTAC  | 157.44                         | peak sites     |      |
| Os02g13430 | 0                 | 0.57              | GTCTGGTGAGTTGCCTGATACG | TGTTGTTGATGGTGTCCGAGTC | 165.87                         | peak sites     |      |
| Os01g18630 | 0                 | -0.34             | TTGCGAGATGGCTGTTGTCT   | GCTGGTGCACATAGCAAAG    | 64.23                          | peak sites     |      |
| Os01g03010 | 0                 | 0.29              | ACTATGGTGGCTGTCTACA    | CGATGCTTAACGGTCTTG     | -                              | non-peak sites |      |
| Os02g16260 | 0                 | -0.66             | ATAATCATCGCTGCTCCATA   | CTGTCCACATCAAGTCGTA    | -                              | non-peak sites |      |
| Os03g03150 | 0                 | -0.39             | GGATGCCACTCGTTGTAA     | ATGGTGAAGGATGCTCTTG    | -                              | non-peak sites |      |
| Os04g03080 | 0                 | -3.07             | CATCCACTATTGCCACTGT    | CCTTACTGAGAACCTACCATT  | -                              | non-peak sites |      |
| Os05g03840 | 0                 | -0.38             | AGAATCATCGTGGCTTGTA    | CGTCCTGTTCCATTGTCA     | -                              | non-peak sites |      |
| Os06g02380 | 0                 | 2.74              | AGCCTTATCCTCTCCTCTC    | ATCCACCGAATCCTCCAA     | -                              | non-peak sites |      |
| Os07g17160 | 0                 | -2.09             | GCAATCTGGAAGGAGTTCA    | CCGTGATGACTAATGTGTAAC  | -                              | non-peak sites |      |
| Os08g03670 | 0                 | -0.15             | ACGAAGAATCACCTGACAAT   | ACATAGACGCCACGAGAT     | -                              | non-peak sites |      |
| Os09g06770 | 0                 | 3.61              | CCAGCTAATCAATCATCATCG  | ATCGTTCGGTTCTATCCAG    | -                              | non-peak sites |      |
| Os10g17630 | 0                 | -2.94             | AACATCTGCTATGCTAAGGT   | TTGCTATTCCGTGTGACTAA   | -                              | non-peak sites |      |
| Os12g19470 | 0                 | -1.94             | GCACCACATGCTTGATAGG    | TAAGTTGCAGTGTGCTGCCT   | -                              | non-peak sites |      |
| Os02g08110 | 0                 | -2.10             | AATGTCTCGTCCAGTTCTAG   | ACTACCTCCATCGTGCTAT    | -                              | non-peak sites |      |
| Os09g03500 | 0                 | -2.56             | CCTCATACTCCTCCATCC     | GGCATAAACCTACTCCAT     | -                              | non-peak sites |      |
| Os11g06490 | 0                 | -2.19             | GGTAAGGAGGACGGAGTAT    | CACAAGAAGTAACGGTAAGAC  | -                              | non-peak sites |      |

<sup>1</sup>Normalized C(t) of input DNA .

<sup>2</sup>Normalized  $\Delta$ C(t) of ChIP DNA .



**Supplementary Table 8. Over-represented functions of genes associated with Kcr modification.**

| <b>GO term</b>    | <b>Ontology</b> | <b>Description</b>                           | <b>Number in input list</b> | <b>Number in Ref</b> | <b>FDR</b> |
|-------------------|-----------------|----------------------------------------------|-----------------------------|----------------------|------------|
| <b>GO:0044249</b> | P               | cellular biosynthetic process                | 256                         | 890                  | 0.0057     |
| <b>GO:0034645</b> | P               | cellular macromolecule biosynthetic process  | 256                         | 890                  | 0.0057     |
| <b>GO:0009059</b> | P               | macromolecule biosynthetic process           | 256                         | 890                  | 0.0057     |
| <b>GO:0006412</b> | P               | translation                                  | 256                         | 890                  | 0.0057     |
| <b>GO:0010467</b> | P               | gene expression                              | 300                         | 1076                 | 0.0073     |
| <b>GO:0019538</b> | P               | protein metabolic process                    | 1451                        | 6088                 | 0.023      |
| <b>GO:0044267</b> | P               | cellular protein metabolic process           | 1164                        | 4849                 | 0.035      |
| <b>GO:0043170</b> | P               | macromolecule metabolic process              | 1580                        | 6691                 | 0.035      |
| <b>GO:0005198</b> | F               | structural molecule activity                 | 192                         | 672                  | 0.039      |
| <b>GO:0000166</b> | F               | nucleotide binding                           | 858                         | 3490                 | 0.039      |
| <b>GO:0005829</b> | C               | cytosol                                      | 854                         | 3345                 | 0.0017     |
| <b>GO:0005737</b> | C               | cytoplasm                                    | 2771                        | 11866                | 0.0021     |
| <b>GO:0005622</b> | C               | intracellular                                | 3483                        | 15144                | 0.0023     |
| <b>GO:0044444</b> | C               | cytoplasmic part                             | 2558                        | 10930                | 0.0023     |
| <b>GO:0031974</b> | C               | membrane-enclosed lumen                      | 215                         | 743                  | 0.003      |
| <b>GO:0031981</b> | C               | nuclear lumen                                | 215                         | 743                  | 0.003      |
| <b>GO:0043233</b> | C               | organelle lumen                              | 215                         | 743                  | 0.003      |
| <b>GO:0044424</b> | C               | intracellular part                           | 3333                        | 14514                | 0.003      |
| <b>GO:0005730</b> | C               | nucleolus                                    | 152                         | 495                  | 0.003      |
| <b>GO:0005886</b> | C               | plasma membrane                              | 1040                        | 4240                 | 0.003      |
| <b>GO:0070013</b> | C               | intracellular organelle lumen                | 215                         | 743                  | 0.003      |
| <b>GO:0044428</b> | C               | nuclear part                                 | 239                         | 844                  | 0.0031     |
| <b>GO:0044446</b> | C               | intracellular organelle part                 | 239                         | 844                  | 0.0031     |
| <b>GO:0044422</b> | C               | organelle part                               | 239                         | 844                  | 0.0031     |
| <b>GO:0005794</b> | C               | Golgi apparatus                              | 138                         | 460                  | 0.0094     |
| <b>GO:0043232</b> | C               | intracellular non-membrane-bounded organelle | 326                         | 1237                 | 0.014      |
| <b>GO:0043228</b> | C               | non-membrane-bounded organelle               | 326                         | 1237                 | 0.014      |
| <b>GO:0044464</b> | C               | cell part                                    | 4386                        | 19532                | 0.026      |
| <b>GO:0005840</b> | C               | ribosome                                     | 172                         | 624                  | 0.036      |
| <b>GO:0030529</b> | C               | ribonucleoprotein complex                    | 172                         | 624                  | 0.036      |
| <b>GO:0032991</b> | C               | macromolecular complex                       | 172                         | 624                  | 0.036      |
